# Supplementary material for: Entrepreneurial prototyping: the role of purpose, prototype recycling, and skills bricolage
Source: Springer Nature journal article supplement (doi:10.1007/s11187-024-00922-2), 2024-04-11
Supplement: MOESM1 [file 26968502]

**Appendix 1: Overview of prototyping instances and categorization**

| **Venture (case)** | **Instance  (unit of analysis)** | **Prototype (artifact)** | **Outcome of the process** | **Purpose** | **Directed transformation/Flexible experimentation purpose** | **Recycled prototype (including first use)** | **Skills bricolage (yes/no)** |
| --- | --- | --- | --- | --- | --- | --- | --- |
| Alpha | A1 | Concept models in polystyrene | Concept models of proposed solution using polystyrene and wood sticks | Designing of distant physical location required tangible manifestation to get on site | Flexible experimentation | Yes | Yes |
| Alpha | A2 | Physical medium-fidelity scenography models | Facilitate communication and dialogue to gain feedback on the proposed solution | Demonstrate how the solution could look like and function | Flexible experimentation | Yes | Yes |
| Alpha | A3 | Sketching and cardboard modelling in combination | Imagining possible solutions that took into account the constraints of the building, such as walls and pillars | Creatively explore how solution could be designed and spatially structured | Flexible experimentation | Yes | Yes |
| Alpha | A4 | Simple cardboard model | Facilitating interaction and communication among key stakeholders | Using previously created cardboard model in meeting with stakeholders | Flexible experimentation | Yes | Yes |
| Alpha | A5 | 2D inspirational pictures | Fostering conversation with and among users about problems, needs, and desires | Creation of means to foster dialogue with and among key stakeholders | Flexible experimentation | No | Yes |
| Alpha | A6 | Visual mood boards | Feedback and inputs on current work practices and desires about the future | Explore current situations and user desires | Flexible experimentation | No | Yes |
| Alpha | A7 | Visual mind mapping of pictures and sketches | Changing analogies driving the creative work | Combine and group abstract ideas into clusters to inform subsequent work | Flexible experimentation | No | Yes |
| Alpha | A8 | Simple sketches | Enabled interaction with key stakeholders | Desire to manifest abstract ideas into tangible representations | Flexible experimentation | No | Yes |
| Alpha | A9 | Highly refined laser-cut scale-model | Acceptance from key stakeholders. | Persuade key stakeholders to accept the proposed solution | Directed transformation | No | No |
| Alpha | A10 | Cardboard scale-model | Reflecting upon design criteria | Thinking through hands-on modelling | Flexible experimentation | Yes | Yes |
| Alpha | A11 | Cardboard scale-model | Mobilization of stakeholders | Presentation of solution to key stakeholders | Flexible experimentation | Yes | Yes |
| Alpha | A12 | Cardboard scale-models of furniture and humans | Fostering dialogue and enabling physical interaction with models | Bring larger scale-models to life by creating miniature interior for the larger model | Flexible experimentation | Yes | Yes |
| Alpha | A13 | Scale models in clay | Informed the decision about final design and dimensions, which could be handed off to carpenter. | Evaluate numerous versions of form factor of a solution | Directed transformation | Yes | Yes |
| Alpha | A14 | Simple sketches of chair designs | Ideation with carpenter before physical modelling | Manifest ideas to explore alternatives | Flexible experimentation | No | Yes |
| Alpha | A15 | Physical hacking of existing products | Development of interior for customer | Materializing ideas from sketches through physical modeling in collaboration with partner | Directed transformation | No | No |
| Alpha | A16 | Cardboard scale-model of focal objects | Stakeholders gained a sense of ownership as they moved, twisted and turned the prototype, while providing inputs for subsequent development | Create material object for joint co-creation in social interaction with differ group of stakeholders | Flexible experimentation | Yes | Yes |
| Beta | B1 | Wood mockup and existing competitor products | Gaining new perspectives and ideas on imagined context of use | Examine limitations of existing product solutions and explore possible use scenarios with imagined solution. | Flexible experimentation | No | Yes |
| Beta | B2 | Clay models | Selection of possible form for design | Evaluate various forms and design | Directed transformation | No | Yes |
| Beta | B3 | Polystyrene mockups | Refined the form of the design | Rapid iteration on the imagined form in more static material | Directed transformation | No | Yes |
| Beta | B4 | 3D printed non-functional models | Verify the scale and size of the prototype | Materialize concept in high fidelity manner | Directed transformation | No | Yes |
| Beta | B5 | Sketching on pictures of related products | Selection of ways to feature legal information and bar code | Discover ways to feature various information | Directed transformation | No | Yes |
| Beta | B6 | High-fidelity technical drawings | Ease sharing of technical aspects and dimensions of solution to partner abroad | Communicate precise details about design to partner | Directed transformation | Yes | Yes |
| Beta | B7 | Drawings on visual screenshots | Reduced misunderstandings and improved collaboration | Online collaboration with partner abroad | Directed transformation | No | Yes |
| Beta | B8 | 3D CAD rendering | Evaluation of aspects | Technical development of solution in 3D | Directed transformation | Yes | Yes |
| Beta | B9 | 2D digital CAD rendering | Visualize and select aesthetic design of product | Explore how the product could look | Flexible experimentation | Yes | Yes |
| Beta | B10 | Drawing on visual renderings | Reduced misunderstandings and improved collaboration | Demonstrate changes to partner abroad | Directed transformation | No | Yes |
| Beta | B11 | Rudimentary CAD visualizations | Decision on the visual design | Quickly evaluate possible visual designs | Directed transformation | No | Yes |
| Beta | B12 | 2D digital visualization of front-cover | Directed transformation attention to the focal aspect | Communicate suggestions for improvements | Directed transformation | No | Yes |
| Beta | B13 | Cardboard prototype of display stand | Demonstration of solution | Communicate how product can be displayed | Directed transformation | Yes | Yes |
| Beta | B14 | Quick drawings on screenshots of display | Reduced misunderstandings from written communication | Communicate suggestions for improvements to cardboard display | Directed transformation | No | Yes |
| Beta | B15 | Low-fidelity physical models | Validating performance | Testing performance and functionality | Directed transformation | No | Yes |
| Beta | B16 | Non-functional physical model with high-fidelity design | Acceptance of the visual and physical design | Examination of the look and feel of the product | Directed transformation | No | Yes |
| Beta | B17 | High-fidelity functional models | Surfacing need for further development of particular aspects | Open-ended evaluation of highly refined functional prototype | Flexible experimentation | Yes | Yes |
| Beta | B18 | Combining videos and pictures of prototype into communication package | Improved demonstration and presentation of product and venture in meetings | Need for communication tool to support future stakeholder interaction | Directed transformation | Yes | Yes |
| Beta | B19 | Online website landing page | Limited concrete insight due to lacking attention to particular measures of interest | Get feeling of interest into firm and solution | Flexible experimentation | No | No |
| Beta | B20 | Live demonstration of physical prototype | Ease demonstration of concept and solution | Communicate how the solution works to stakeholders | Directed transformation | Yes | Yes |
| Beta | B21 | Sketches of output power-plug | Discovered possible solution for problem | Overcome problem with power output of solution | Directed transformation | Yes | Yes |
| Beta | B22 | 3D-printed model of output power-plug | Verified the solution, which were communicated to partner abroad | Materialize aspect from sketches in physical form | Directed transformation | Yes | Yes |
| Beta | B23 | Customized visualizations for stakeholders | Improved demonstration of the product to particular stakeholders | Evaluate whether stakeholder interaction is improved by customized visualizations | Directed transformation | No | Yes |
| Gamma | C1 | 2D CAD models | Selection of concept | Iterative development of a digital prototype. | Directed transformation | Yes | Yes |
| Gamma | C2 | Rudimentary half-scale models | Overcome limited access to machinery and validated that concept could be physically produced. | Quickly provide physical form to 3D models with hobby knife | Directed transformation | No | Yes |
| Gamma | C3 | Half-scale prototypes using FabLab machinery | Validated that product could be produced using the intended technique | Test technical feasibility of production | Directed transformation | Yes | Yes |
| Gamma | C4 | Photographs of Half-scale prototypes | Raised funding for further development to examine full-scale functionality | Apply for funding to develop full-scale prototypes using half-scale prototypes | Directed transformation | Yes | Yes |
| Gamma | C5 | Full-scale functional prototypes | Verified that full-scale prototypes could work | Examine functionality of full-scale prototype | Directed transformation | Yes | Yes |
| Gamma | C6 | Full-scale systems demonstration | Learned that solution was easy to build with, and obtain useful pictures and videos for promotion | Evaluate the prototype outside | Flexible experimentation | Yes | Yes |
| Gamma | C7 | Using full-scale systems demonstration | Ease demonstration of concept and solution | Inviting stakeholders to and using photo and video material of construction of the full-scale system for promotion | Flexible experimentation | Yes | Yes |
| Gamma | C8 | School competition | Verified that the system was faster and easier than conventional systems | Using students from nearby school, the purpose was to the building process and assembling speed | Directed transformation | Yes | Yes |
| Gamma | C9 | Full-scale prototype performance | Verifying performance across multiple aspects related to product in use, such as inside-outside performance | Physical testing and measuring of performance indicators on product in natural weather context | Directed transformation | Yes | Yes |
| Gamma | C10 | Full-scale prototype performance | Verifying expectations about strength | Testing the ability of the prototype to sustain immense weight | Directed transformation | Yes | Yes |
| Gamma | C11 | 3D CAD rendering | Enabled alternative 3D demonstration via 2D medium | Online presentation of solution | Directed transformation | Yes | Yes |
| Gamma | C12 | Combination of physical prototype and 2D CAD rendering | The combination of visual and physical materials enabled demonstration of the product and the underlying concept | Ease the presentation and demonstration of solution at industry fairs | Flexible experimentation | Yes | Yes |
| Gamma | C13 | High-fidelity technical drawings | Enabled the use of laser printing, and eased more technical interaction with participants that possess technical know-how. | Concretize the specific dimensions and measures of the solution | Directed transformation | Yes | Yes |
| Gamma | C14 | Multiple rapid plywood models | Evaluation of possibilities for how to improve the prototype for packaging and shipping | Overcome the limits of CAD software for a particular aspect through quick and simple physical modelling. | Directed transformation | No | Yes |
| Gamma | C15 | Section of full-scale functional prototypes | Sparked increased interest across multiple fairs | Wanted something that could physically show-case the solution at multiple industry fairs | Flexible experimentation | Yes | Yes |
| Gamma | C16 | Video demonstration of assembly of low-fidelity prototypes | Video used as a visual communication means to overcome written description and achieve successful fund seeking | Desire to demonstrate assembly using low-fidelity prototypes | Flexible experimentation | No | Yes |
| Gamma | C17 | Video demonstration of the founder assembling the system | Provided a visual communication means for subsequent promotion | Desire to demonstrate the system's pace and simplicity in assembly using high-fidelity prototypes | Flexible experimentation | No | Yes |
| Gamma | C18 | High-fidelity technical drawings | Successfully achieved patent based on the highly refined drawings with precise specifications | Need to further refine technical drawings accompanied by written description to apply for patent | Directed transformation | Yes | Yes |
| Gamma | C19 | Combination of high-fidelity technical drawings | Reusing and combining previous technical drawings into library online, which was successfully promoted online | Promotion of the solution to prospective customers in the field, requiring highly detailed specifications | Directed transformation | Yes | Yes |
| Delta | D1 | Experimentation with materials | Discovered possible coloring methods for customizing materials | Desire to explore new techniques | Flexible experimentation | Yes | No |
| Delta | D2 | Low-fidelity mockups | Hands-on modeling fostered reflection | Materialize ideas to explore physical aspects | Flexible experimentation | Yes | Yes |
| Delta | D3 | Simple paper mockups for easy manipulation | Generated numerous ideas for visual aesthetic designs | Explore visual designs and looks | Flexible experimentation | No | Yes |
| Delta | D4 | Oversized provotype clown shoes | Limited particular impact on subsequent development. | Desire to provoke reflection upon the nature of useful footwear | Flexible experimentation | No | Yes |
| Delta | D5 | Combination of surplus materials, hand-drawn sketches, and inspirational pictures | Found numerous possible uses of the surplus leather, and eventually made a leather case for sunglasses | Find ways to use surplus materials from the creation of leather shoes using inspirational pictures found online | Flexible experimentation | Yes | Yes |
| Delta | D6 | Social media test of purchase interest | Managed to sell the product via an Instagram video with direct call to action | Test interest in actually buying the case for sunglasses made by surplus leather | Directed transformation | Yes | Yes |
| Delta | D7 | Simple sketching | Informing subsequent efforts without investing valuable materials | Manifestation of ideas into concrete visualizations | Flexible experimentation | Yes | Yes |
| Delta | D8 | Clustering inspirational pictures | Created multiple different styles and stylistic aspects for future designs | Explore ideas by combining abstract ideas, available sketches, and concrete examples together | Flexible experimentation | No | Yes |
| Delta | D9 | Low-fidelity shirts | Limited outcomes of the creative efforts | Curiosity about the area of clothing, and the techniques involved in clothing design | Flexible experimentation | No | No |
| Epsilon | E1 | Interactive Figma mockups | Provoked reflection upon how the intended solution should work. | Verify that they can create the imagined solution | Flexible experimentation | Yes | No |
| Epsilon | E2 | Digital Typeform prototype | Produced open-ended and general feedback from prospective users recruited via social media | Simulate the expected user journey to gather information from users | Directed transformation | Yes | Yes |
| Epsilon | E3 | Online screensharing test | Verified that participants had limited problems in finding the right information for the given tasks | Testing the digital platform by guiding participants via specific tasks | Directed transformation | Yes | Yes |
| Epsilon | E4 | Early-stage WordPress website | Limited impact on subsequent activities, as the entrepreneurs wanted something more complex and advanced, although they still link to the website when pitching | Enhance the legitimacy of the venture following the | Flexible experimentation | No | No |
| Epsilon | E5 | Mechanical turk | Limited impact as the prototype was never realized | Establish proof of concept | Directed transformation | No | Yes |
| Epsilon | E6 | Conversation simulation video | Resulted in new ideas for future promotion, and gave them something to pitch in subsequent contest | Make prospective users talk and explicate thoughts about the problem | Flexible experimentation | Yes | Yes |
| Epsilon | E7 | Typeform prototype pitch | Promotion of venture online via social media | Demonstrate the concept to stakeholders via of the typeform prototype with voice over from previous focus group participants | Flexible experimentation | Yes | Yes |
| Epsilon | E8 | Video demonstration | Granted access to an accelerator | Desire to broadly pitch and promote the venture on social media | Flexible experimentation | Yes | Yes |
| Epsilon | E9 | Simulation of artificial intelligence function through combination of video and speak | Gathered numerous inputs on the challenges related to the legal aspects following divorces from users in focus groups | Gather feedback from prospective users on particular challenge of divorce | Flexible experimentation | Yes | Yes |
| Epsilon | E10 | Pitch deck with visual slideshow simulation of the concept | Limited impact on subsequent activities | Test the interest among key stakeholders | Directed transformation | No | Yes |
| Epsilon | E11 | Visual business model representations | While aligning the two entrepreneurs, the session produced limited impact, as the instance fostered numerous assumptions and confusion. | Explore possible business models using whiteboard sketching and business model canvas for ideation | Flexible experimentation | No | Yes |
| Zeta | Z1 | Low-fidelity concept model in basic materials | Developed a glove-like concept model that could be shown to users | Explore and ideate numerous ways to hold narrow objects | Flexible experimentation | Yes | Yes |
| Zeta | Z2 | Low-fidelity concept model in basic materials | Gathered vital user requirements related to discretion of the solution | Gather open-ended user feedback on the glove-like concept | Flexible experimentation | Yes | Yes |
| Zeta | Z3 | Low-fidelity concept model using balloon | Decision to continue with the concept of air given its flexibility | Evaluate whether air could represent a useful approach | Directed transformation | Yes | Yes |
| Zeta | Z4 | Low-fidelity concept model using balloon | Positive feedback from users, who liked multifunctionality | Gather user feedback on balloon concept | Flexible experimentation | Yes | Yes |
| Zeta | Z5 | Concept model using inflatable armband | Verified the multifunctional capacity of the concept | Evaluate the use of inflatable armband rather than balloon | Directed transformation | No | Yes |
| Zeta | Z6 | Low-fidelity prototype with tape surface | Generated inputs for possible everyday uses that prospective users could imagine with the solution | Gain user feedback on the prototype in use with everyday objects | Flexible experimentation | Yes | Yes |
| Zeta | Z7 | Functional concept model with reverted air pump | Verified functionality of more technical solution | Testing functional ability of concept | Directed transformation | Yes | Yes |
| Zeta | Z8 | Combination of mundane everyday objects and simple mockups | Learned that different users need different surface textures, which helped them overcome pre-commitment on particular design and instead seek development of changeable covers. | Gather inputs on surface materials and textures in physical workshop with prospective users | Directed transformation | No | Yes |
| Zeta | Z9 | Experience prototyping with existing solutions on the market | Insight into significant limitations of existing solutions, and ideas for improvements. | Explore existing solutions over extended time to foster empathy and perspective from user point of view | Flexible experimentation | No | Yes |
| Zeta | Z10 | Full-scale low-fidelity prototype with tape | Decision made on useful form | Evaluation of form factors | Directed transformation | Yes | Yes |
| Zeta | Z11 | Live demonstration of functional prototype | Verification of interest as the venture won the category award in major startup competition, providing important legitimacy. | Pitching and live-demonstration of functional, low-fidelity prototype for key stakeholders at award ceremony | Flexible experimentation | Yes | Yes |
| Zeta | Z12 | Mobilization of partners with previous functional concept model | Enabled physical demonstration of the pros and cons of the concept-model and acted to facilitate expert inputs. | Needed to develop more technically refined iterations, requiring the mobilization of potential expert partners. | Directed transformation | Yes | Yes |
| Zeta | Z13 | 3D printed functional model | Insights into the limits of 3D printed components | Rely on expert partner to create 3D printed components to verify the integrated product prototype in full. | Directed transformation | Yes | No |
| Zeta | Z14 | Stress testing central aspect of solution | Verified durability of moveable part | Test the durability of key function | Directed transformation | Yes | No |
| Zeta | Z15 | Pictures of prototype | Generated more than 300 ideas from people with mobility issues in closed online groups | Gather feedback on immediate concept and input on possible additions and refinements from prospective users in the target segment | Flexible experimentation | Yes | Yes |
| Zeta | Z16 | Fictional paper-based pre-order MVP | Verified early interest among users, while subsequently gathering inputs from those who declined the offer. | Evaluation of interest in actually pre-ordering the solution among users | Directed transformation | No | Yes |
| Zeta | Z17 | Online pre-order button coupled with product visualization | Verified early interest, although minor, and discovered important challenges related to technical infrastructure of payment | Test interest in actually pre-ordering the product based on simple pre-order function added on the website | Directed transformation | No | Yes |
| Zeta | Z18 | Combining pictures of prototype iterations into pitch deck | Learned over numerous pitches that more attention should be devoted to establishing a business case for more business-oriented venture pitching. | Create useful means for communication and pitching of the venture | Flexible experimentation | Yes | Yes |
| Zeta | Z19 | Fund seeking with pictures and description of the prototype | Successfully raised capital from fund to develop demo-models for later crowdfunding | Fundraising for further development of more refined physical demo-model | Directed transformation | Yes | Yes |
| Zeta | Z20 | Long-term exploration of experience using demo-model | Continuous stream of feedback on various aspects and inputs for subsequent refinements. | Explore the product in actual everyday use among a few selected users over an extended period. | Flexible experimentation | Yes | Yes |
| Zeta | Z21 | Crowdfunding with video demonstration of prototype and visualizations | Verified interest among prospective users, and generated media coverage | Verify broader product-market fit with video demonstration of the product at current stage coupled with visualizations of future design with a direct call-to-action to become a funder. | Directed transformation | Yes | Yes |
| Zeta | Z22 | Existing solutions on market | Insights into available options on the market, and selection of the most useful one for the particular customer group. | Need to design useful packaging for users, hence tested and evaluated numerous options together with selected expert users. | Flexible experimentation | No | Yes |
| Zeta | Z23 | Thought experimenting on business model prototypes | Generated numerous ideas for payment models, and invested time to learn the most well-known business model tools. | Explore potential business model options to improve future pitching of the ventures | Flexible experimentation | Yes | No |
| Zeta | Z24 | Physical pitching of demo model combined with photos from the development process | Selected for accelerator program and verified interest as several potential investors booked meetings | Mobilize potential investors through physical demonstration as part of an investor day in accelerator context | Directed transformation | Yes | Yes |
| Theta | T1 | Whiteboard concept ideation |  |  | Flexible experimentation | No | Yes |
| Theta | T2 | Low-fidelity Microsoft Word visualization | Selection of visual profile | Simple generation of ideas for visual design | Flexible experimentation | Yes | Yes |
| Theta | T3 | Low-fidelity Microsoft Word visualization | Verified early interest, but entrepreneurs ended up defending the idea. | Gather first feedback on proposed concept from a local stakeholder | Flexible experimentation | Yes | Yes |
| Theta | T4 | Photoshop website mockup | Gained too much feedback, which lead to confusion. Stakeholders had multiple ideas for possible features rather than providing feedback on the visual mockup. | Demonstrate the concept in more refined manner to gather more focused feedback | Flexible experimentation | Yes | Yes |
| Theta | T5 | Customized visual picture-deck for different stakeholders | Improved stakeholder interaction and openness to the concept. | Improve feedback collection through visualizations customized to stakeholders. | Flexible experimentation | No | Yes |
| Theta | T6 | Screenshot picture-deck | Using screenshots of the platform to physically simulate a working platform in enabled early feedback gathering | Demonstrate the offline, non-functional prototype under development to stakeholders | Flexible experimentation | Yes | Yes |
| Theta | T7 | Combining inspirational pictures | Generated many ideas for possible directions with the platform under development. | Explore possible ways to structure the platform by combining inspirational pictures and screenshot together | Flexible experimentation | No | Yes |
| Theta | T8 | Early-stage functional offline website | Development of more advanced prototype version required significant investment in learning the skill | Create functional version for more focused technical development and demonstration. | Flexible experimentation | Yes | No |
| Theta | T9 | Early-stage functional offline website | Multiple stakeholders indicated early interest | Demonstration of the work in progress to gather feedback from key stakeholders | Directed transformation | Yes | Yes |
| Theta | T10 | Refined offline beta website | Verified online and cross-device functionality | Testing offline version of beta version across platforms, devices and operating systems | Directed transformation | Yes | Yes |
| Theta | T11 | Beta version of platform | Sparked interest among the user group and persuaded some to create profiles on the platform. | Demonstration of early version for prospective users to verify their interest in actually signing up. | Directed transformation | Yes | Yes |
| Theta | T12 | Physical launch of online platform | Indications of interest in concept based on a high number of participants | Creating a physical, social event and tracking number of interested participants to evaluate actual interest | Directed transformation | Yes | Yes |
| Theta | T13 | Simple visualization mockups in Sketch | Enhancing the ability of non-technical founder to communicate suggestions to the technical lead entrepreneur. | Overcome limited technical skills to illustrate design improvements to the technical lead. | Flexible experimentation | Yes | No |
| Theta | T14 | Beta version of platform | Enhanced the fit between the users and the evolving solution, but continuously risked over-designing the solution | Using the online platform as an open and on-going prototype for continuous refinement based on user feedback | Flexible experimentation | Yes | Yes |
| Theta | T15 | Experiment with network addition | Not successful feature, which was eventually removed. | Test the assumption that users wanted to join groups | Directed transformation | No | Yes |
| Theta | T16 | Experiment with referral function | Development of the feature was too difficult to implement, hence discontinued. | User feedback indicated particular problem, hence desire to test their imagined solution based on inspiration from other platforms | Directed transformation | No | No |
| Theta | T17 | Thought experimenting on visual business model prototypes | Given the limited external testing, the instance resulted in an endless divergence of ideas. | Explore possible directions for future business model | Flexible experimentation | No | Yes |
| Theta | T18 | User testing of platform | Indications of interest, but numerous inputs for desired future functionalities | A re-designed version was quickly put into hands of a group of people to gauge early inputs | Flexible experimentation | Yes | Yes |
| Theta | T19 | Experiment with new content classification | Discontinued the online test, as users struggled to select fitting categories for their content. | User feedback indicated the need for a new categorization scheme for the content, hence they tried to evaluate an imagined solution. | Directed transformation | No | Yes |
| Theta | T20 | Mocqup wireframe | Enabled online communication of the desired platform and enhanced the subsequent back-and-forth iterations. | Overcome limited technical skills to Show vision of the platform to developer abroad, who required something tangible. | Directed transformation | Yes | No |
| Theta | T21 | Landing page signup | Validated interest through a number of signups and combined these into a list of emails for potential newsletter. | Creation of simple landing page with signup call-to-action to test interest in the new platform. | Directed transformation | No | Yes |
| Theta | T22 | Experiments to drive traffic | Generated high traffic to the platform and gained new followers on all social media platforms. | Evaluate idea for driving traffic through numerous online events. | Directed transformation | No | Yes |
| Kappa | K1 | Early-stage functional, low-fidelity prototype | Gradually converged around a particular solution concept, which would become the first prototype | Exploring ways to build the Flexible experimentation idea about a potential solution | Flexible experimentation | Yes | Yes |
| Kappa | K2 | Fund seeking concept illustrations | Successfully raised small fund from national funder | Using simple visualization coupled with written description of concept and developmental stage fund seek | Directed transformation | No | Yes |
| Kappa | K3 | Iterative trial-and-error on low-fidelity, functional prototype | Improved functionality of solution | Continuous optimization of technical functionality of solution | Directed transformation | Yes | Yes |
| Kappa | K4 | Pilot test of low-fidelity functional prototype | Verified functionality, but surfaced important need to increase capacity of certain particular aspects in future iterations | Testing of performance and functionality over extended time in the home of test users | Directed transformation | Yes | Yes |
| Kappa | K5 | Pilot test of low-fidelity functional prototype | User inputs disproved their initial assumption | Assumption testing of delivery and handling | Directed transformation | Yes | Yes |
| Kappa | K6 | Pilot test of low-fidelity functional prototype | Validated user desire to pay deposit and monthly fee | Using same test users to validate assumptions about willingness to pay for continuous use | Directed transformation | Yes | Yes |
| Kappa | K7 | Fund seeking with prototype photos | Failed in raising funds. | Apply for second round of funding from same source | Directed transformation | Yes | Yes |
| Kappa | K8 | Hacking existing solutions | Verified the possibility of using the outer case of an existing product | Re-configuring existing products with their own solution | Directed transformation | Yes | Yes |
| Kappa | K9 | Re-designing early prototypes | Verified that early prototypes could be redesigned to the new case | Re-configuring the early prototypes to fit the new requirements | Directed transformation | Yes | Yes |
| Kappa | K10 | Integrated system testing | Verified the performance and functionality of the integrated system | Testing the functionality of the integrated system in setup and use | Directed transformation | Yes | Yes |
| Kappa | K11 | Video material from pilot testing | While several pitches generated media attention, limited overall impact on the process | Numerous pitching sessions using a combination of photos and videos from pilot testing to demonstrate proof of concept | Directed transformation | Yes | Yes |
| Kappa | K12 | Physical entrepreneur-driven demonstration of prototype | Verified interest among prospective users | Live demonstrating of prototype in use with everyday objects | Directed transformation | Yes | Yes |
| Kappa | K13 | Physical user-driven demonstration of prototype | Improved the demonstration, and verified interest among prospective users, | Inviting locals to live demonstrate prototype in use for other users | Directed transformation | Yes | Yes |
| Kappa | K14 | In situ testing of high-fidelity prototype | Monitored performance of the product in use over extended time | Installing functional system at institution to monitor its performance | Directed transformation | Yes | Yes |
| Kappa | K15 | New website iteration | Limited direct impact, as the website prototype was primarily developed based on desire | Primarily driven by desire for new website | Flexible experimentation | No | No |
| Kappa | K16 | Visual concept illustration | Improved communication with locals | Improve demonstration and overcome language differences with visual means | Flexible experimentation | Yes | Yes |
| Kappa | K17 | Test of interest in new market | Verified some interest in the new market | Creating a simple website to test actual interest in new market | Directed transformation | Yes | Yes |
| Kappa | K18 | Testing of cloud functionality | Testing surfaced particular issues that hinder cloud functionality, which was later solved. | Iterating on the particular aspect of cloud functionality | Directed transformation | Yes | Yes |
| Kappa | K19 | Information gathering on payment models | Learned that users preferred ownership rather than leasing | Input from users and prospective users on preferences for payment | Flexible experimentation | Yes | Yes |
| Kappa | K20 | Performance testing by externals | Technical validation of performance, and generated media attention | Allowing external media to test the product | Directed transformation | Yes | No |
| Kappa | K21 | Performance testing by externals | Results verified previous results on performance | Allowing students to test technical performance of product | Directed transformation | Yes | No |
| Kappa | K22 | Materializing an additional product idea | Idea did not work and was discontinued | Creative ideation of an idea for additional product to accompany the main product | Flexible experimentation | No | No |
| Kappa | K23 | Information gathering on product use | Based on inputs and photos, they learned that product was used for a variety of situations | Rely on early users to provide input on their various uses | Flexible experimentation | Yes | Yes |
| Kappa | K24 | Training with high-fidelity prototype | Improved the capacity of prospective agents to understand the product | Live demonstrating and disassembling the prototype to show prospective agents how the solution works | Flexible experimentation | Yes | Yes |
